# Supplementary material for: Distinguishing NASH Histological Severity Using a Multiplatform Metabolomics Approach
Source: PubMed Central journal article supplement (PMC7240949; doi:10.3390/metabo10040168), 2020-04-24
Supplement: metabolites-10-00168-s001.pdf [file metabolites-10-00168-s001.pdf]

# Supplementary Material

## Distinguishing NASH Histological Severity Using a Multiplatform Metabolomics Approach

**George N. Ioannou<sup>1,2,3\*</sup> G. A. Nagana Gowda,<sup>4</sup> Danijel Djukovic,<sup>4</sup> and Daniel Raftery<sup>4,5,6\*</sup>**

- 1 Division of Gastroenterology, Veterans Affairs Puget Sound Healthcare System and University of Washington, Seattle WA; Georgel@medicine.washington.edu (G.N.I)
- 2 Department of Medicine, Veterans Affairs Puget Sound Healthcare System and University of Washington, Seattle WA.
- 3 Research and Development, Veterans Affairs Puget Sound Healthcare System, Seattle WA.
- 4 Northwest Metabolomics Research Center, Anesthesiology and Pain Medicine, University of Washington, Seattle, WA 98109; ngowda@uw.edu (G.A.N.G); djukovic@uw.edu (D.D.); raftery@uw.edu (D.R.).
- 5 Department of Chemistry, University of Washington, Seattle, WA 98195.
- 6 Fred Hutchinson Cancer Research Center, Seattle, WA 98109.

\* Correspondence:

G.N.I.: Georgel@medicine.washington.edu; Tel.: +1-206-277-3136;

D.R.: draftery@uw.edu; Tel.:+1- 206-543-9709

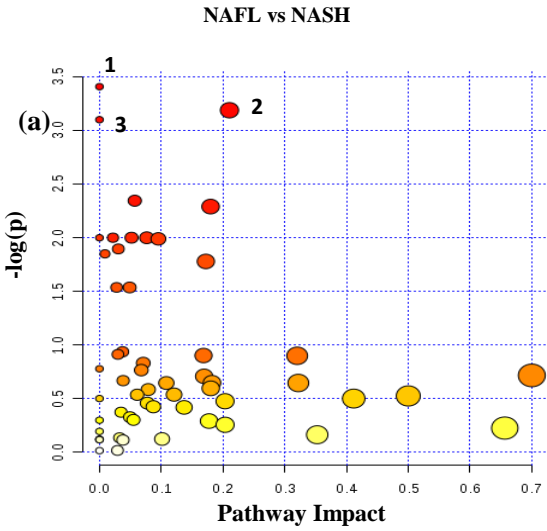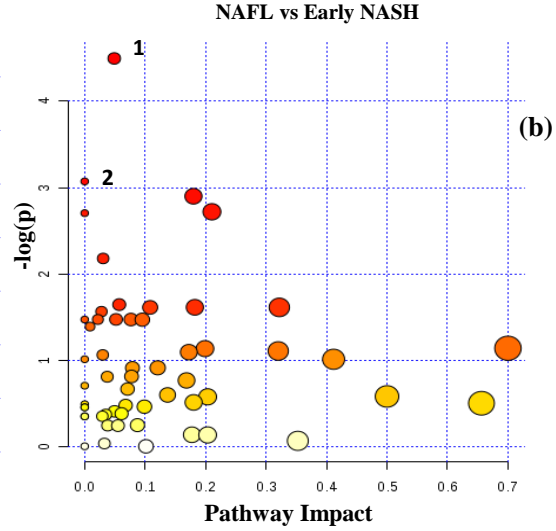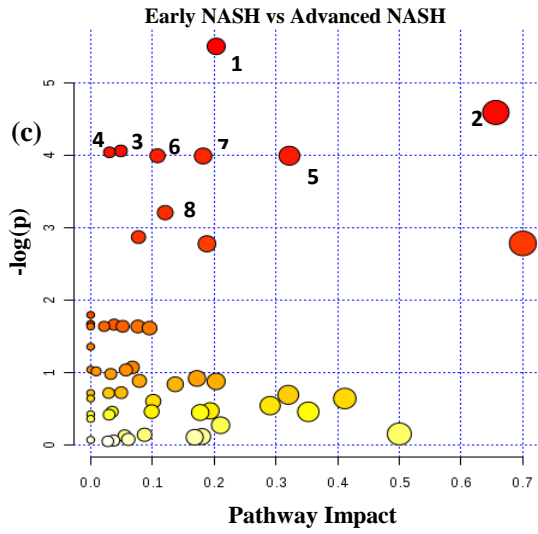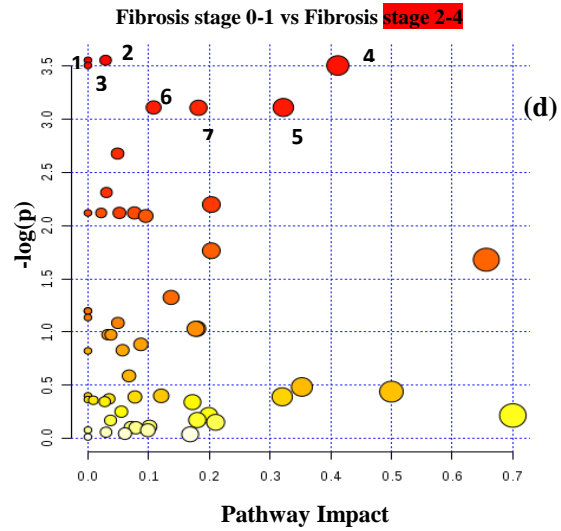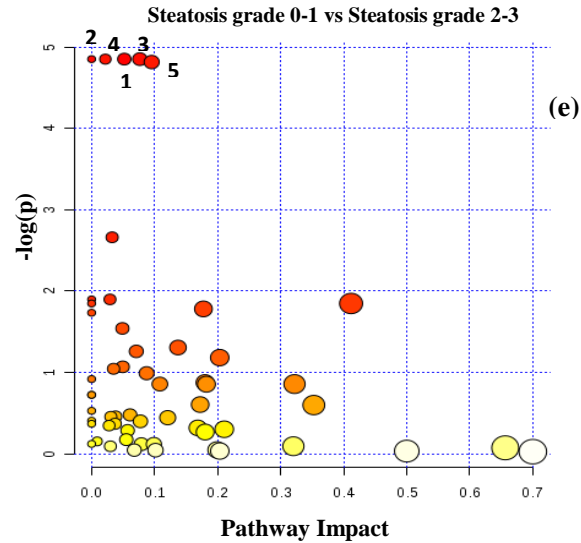

**Figure S1:** Matched pathways obtained from pathway enrichment analysis and the impact of the matched pathways obtained from pathway topology analysis. Each pathway is shown as a circle. The color of the pathway indicates the significance (p-value) of the pathway with red being the most significant ( $p < 0.05$ ) and the size of the circle indicates the impact of the pathway. The results shown here were obtained from the analysis based on 106 mass spectrometry (MS) derived metabolites, which showed a total of 56 matched pathways to distinguish (see also Table S3): (a) NAFL vs. NASH; 3 pathways (labeled 1-3) were significantly different ( $p < 0.05$ ): Fatty acid biosynthesis (1); Tryptophan metabolism (2); Nitrogen metabolism (3); (b) NAFL vs. early NASH; 2 pathways (labeled 1, 2) were significantly different ( $p < 0.05$ ): Ubiquinone and other terpenoid-quinone biosynthesis (1); Fatty acid biosynthesis (2); (c) Early NASH vs. advanced NASH; 8 pathways (labeled 1-8) were significantly different ( $p < 0.05$ ): alpha-Linolenic acid metabolism (1); Linoleic acid metabolism (2); Ubiquinone and other terpenoid-quinone biosynthesis (3); Caffeine metabolism (4); Citrate cycle (TCA cycle) (5); Alanine, aspartate and glutamate metabolism (6); Glyoxylate and dicarboxylate metabolism (7); Pyrimidine metabolism (8); (d) Fibrosis stage 0,1 vs. Fibrosis stage 2,3,4; 7 pathways (labeled 1-7) were significantly different ( $p < 0.05$ ): Porphyrin and chlorophyll metabolism (1); Valine, leucine and isoleucine biosynthesis (2); Aminoacyl-tRNA biosynthesis (3); Glycine, serine and threonine metabolism (4); TCA cycle (5); Alanine, aspartate and glutamate metabolism (6); Glyoxylate and dicarboxylate metabolism (7); and (e) Steatosis grade 0,1 vs. Steatosis grade 2,3; 5 pathways (labeled 1-5) were significantly different ( $p < 0.05$ ): Galactose metabolism (1); Amino sugar and nucleotide sugar metabolism (2); Starch and sucrose metabolism (3); Pentose phosphate pathway (4); Glycolysis and gluconeogenesis (5).

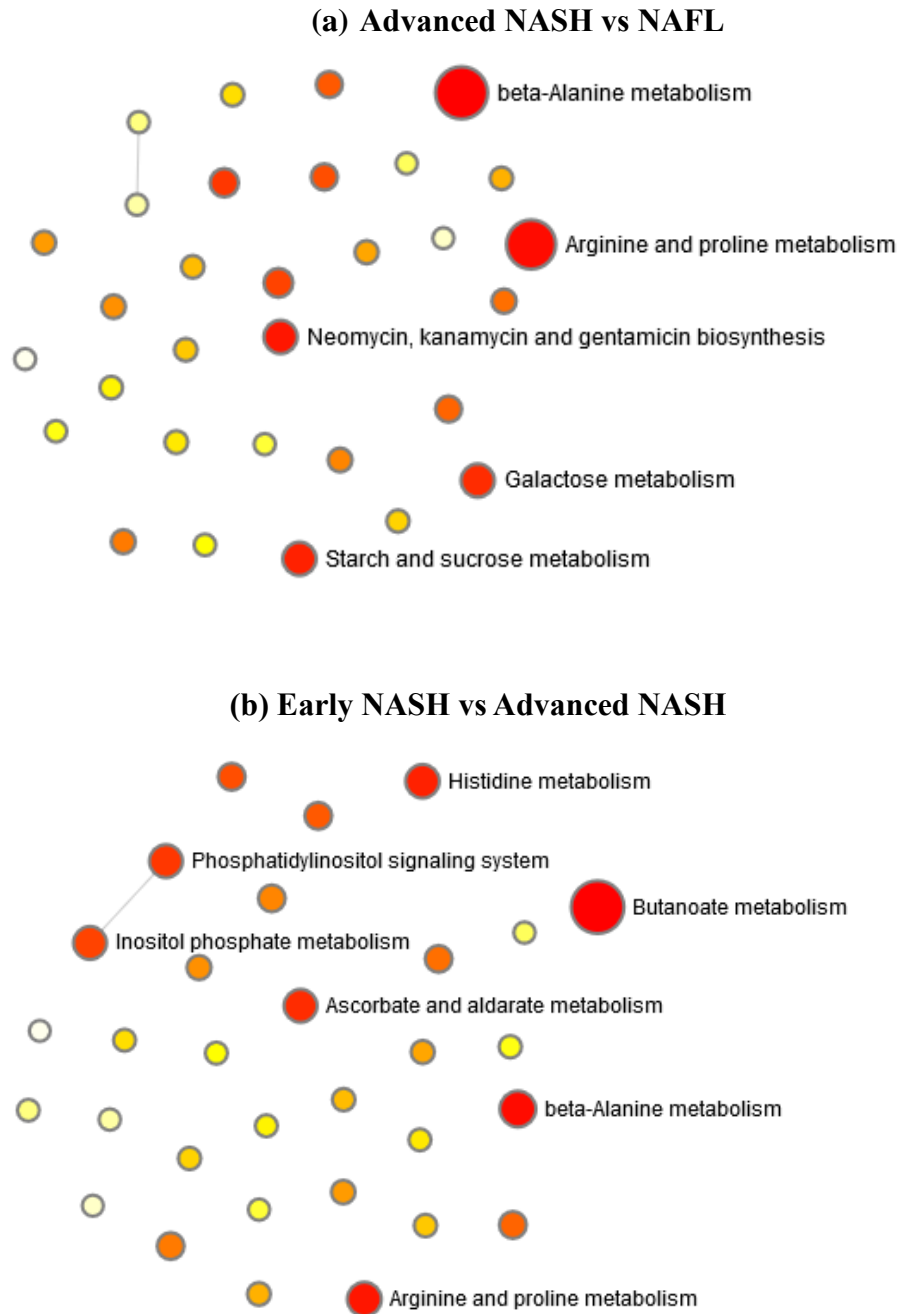

**Figure S2:** Network view of metabolite set enrichment analysis with labeling for some of the prominent sets. Metabolite data were derived from MS. In the figure, each node represents a metabolite set. The color and size indicate the p value and the relative number of hits to the query, respectively. Metabolite sets that are connected by an edge indicate that the number of their shared metabolites is >25% of the total number of their combined metabolites sets. Between advanced NASH and NAFL groups (Fig. S2a), 31 sets were identified of which two sets exhibited high significance. These two sets correspond to (1) beta-alanine metabolism and (2) arginine and proline metabolism; the p value adjusted using false discovery rate for both sets was 0.02. Between early NASH and advanced NASH groups (Fig. S2b), 31 sets were identified of which one set exhibited high significance. This set corresponds to butanoate metabolism and the p value adjusted using the false discovery rate was 0.05.

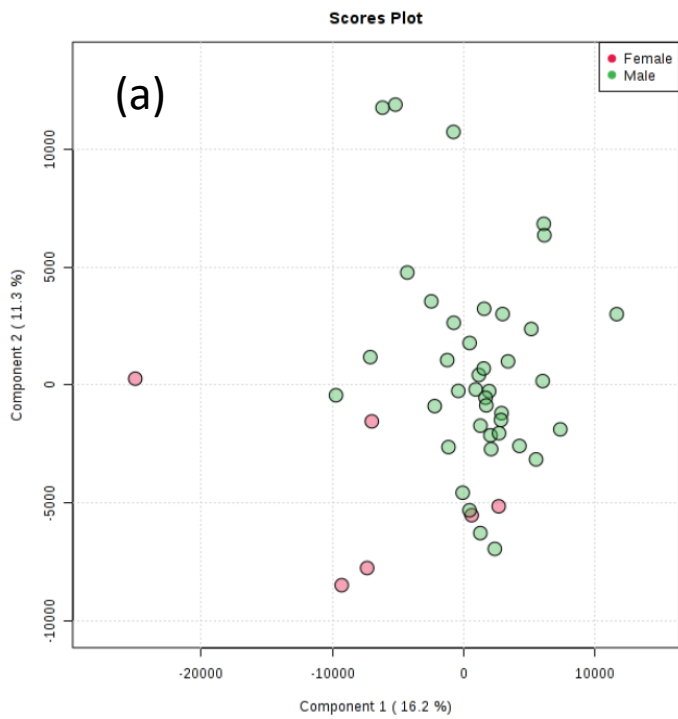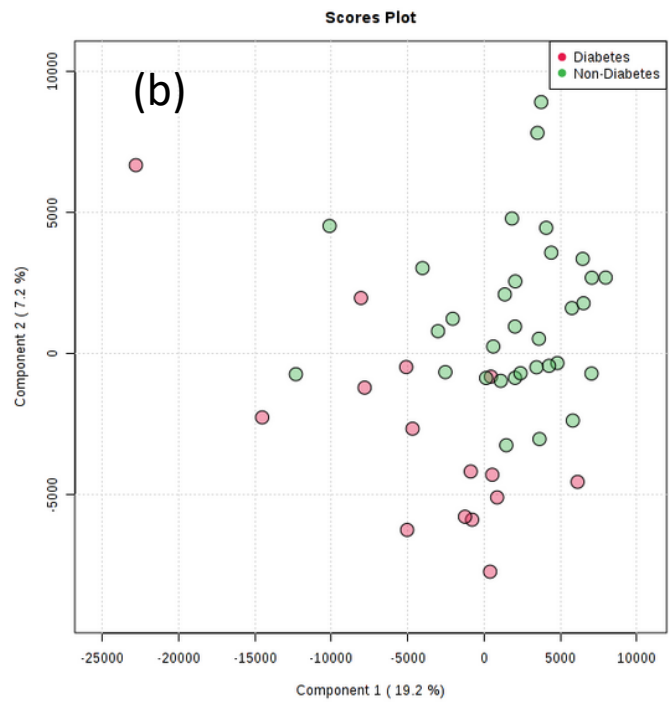

**Figure S3:** Results of PLS-DA of metabolites derived from MS and NMR for (a) male vs female; and (b) diabetes vs non-diabetes patients.

**Table S1:** List of metabolites quantified by MS. The first number in the parenthesis indicates the m/z value for precursor ion and the second number indicates the value for product ion.

|    |                                         |    |                                                                   |
|----|-----------------------------------------|----|-------------------------------------------------------------------|
| 1  | 1/3-Methylhistidine (170.0 / 96.0)      | 54 | Guanidinoacetate (116.0 / 74.0 (2))                               |
| 2  | 12-HETE (319.2 / 179.0)                 | 55 | Histamine (112.0 / 95.0)                                          |
| 3  | 13-HODE (295.2 / 195.0)                 | 56 | Homocysteine (136.0 / 90.0)                                       |
| 4  | 1-Methyladenosine (282.0 / 150.1)       | 57 | Homoserine (120.1 / 74.0)                                         |
| 5  | 1-Methylguanosine (298.0 / 166.1)       | 58 | Hydroxyproline/Aminolevulinate (132.1 / 86.2)                     |
| 6  | 1-Methylhistamine (126.0 / 96.0)        | 59 | Hypoxanthine (135.0 / 92.0)                                       |
| 7  | 2-Amino adipate (160.1 / 116.0)         | 60 | Hyppuric Acid (178.0 / 134.0)                                     |
| 8  | 2-Hydroxyglutarate (147.0 / 129.0)      | 61 | Inosine (269.0 / 137.1)                                           |
| 9  | 2-Hydroxyisovaleric Acid (117.0 / 71.0) | 62 | Inositol (179.0 / 87.0)                                           |
| 10 | 3-Hydroxybutyric acid (103.0 / 59.0)    | 63 | Isovaleric Acid (101.0 / 83.0)                                    |
| 11 | 4-Hydroxybutyrate (105.0 / 77.0)        | 64 | Kynurenate (188.0 / 143.8)                                        |
| 12 | 4-Pyridoxic acid (182.1 / 138.0)        | 65 | Lactate (89.0 / 43.0)                                             |
| 13 | 5-Hydroxytryptophan (221.0 / 133.2)     | 66 | Lactose (341.0 / 59.0)                                            |
| 14 | Acetoacetate (101.0 / 57.0)             | 67 | Linoleic Acid (277.1 / 259.0)                                     |
| 15 | Acetylcarnitine (204.1 / 85.0)          | 68 | Linolenic Acid (279.1 / 261.0)                                    |
| 16 | Acetylcholine (146.1 / 87.0)            | 69 | L-Kynurenine (209.1 / 94.0)                                       |
| 17 | Aconitate (173.0 / 85.0)                | 70 | Malonic Acid (103.0 / 41.0)                                       |
| 18 | Adenosine (268.1 / 136.1)               | 71 | Margaric Acid (269.1 / 251.3)                                     |
| 19 | Adenylosuccinate (462.1 / 79.0)         | 72 | Mevalonate (147.1 / 59.0)                                         |
| 20 | Adipic Acid (144.9 / 83.0)              | 73 | Myristic Acid (227.1 / 209.0)                                     |
| 21 | Agmanite (131.0 / 72.0)                 | 74 | N <sub>2</sub> ,N <sub>2</sub> -Dimethylguanosine (312.0 / 180.1) |
| 22 | Allantoin (157.0 / 114.0)               | 75 | N-Acetylglycine (116.0 / 74.0)                                    |
| 23 | Alpha-Ketoglutaric Acid (145.0 / 101.0) | 76 | Niacinamide (123.0 / 80.0)                                        |
| 24 | Aminoisobutyrate (104.1 / 86.0)         | 77 | Nicotinate (Niacin) (122.0 / 78.0)                                |
| 25 | Anthranilate (136.0 / 118.0)            | 78 | OH-Phenylpyruvate (179.0 / 89.0 (4))                              |
| 26 | Azelaic Acid (187.0 / 125.0)            | 79 | Ornithine (133.1 / 70.0)                                          |
| 27 | Benzoic acid (121.0 / 77.0 (2))         | 80 | Orotate (155.0 / 111.0)                                           |
| 28 | Biotin (243.1 / 200.0)                  | 81 | Oxalacetate (131.0 / 113.0)                                       |
| 29 | Cadaverine (103.0 / 86.0)               | 82 | Oxalic Acid (89.0 / 61.0)                                         |
| 30 | Citraconic Acid (129.0 / 85.0)          | 83 | Oxypurinol (151.0 / 42.0)                                         |
| 31 | Citrulline (174.0 / 131.0)              | 84 | Pentothenate (218.1 / 88.0)                                       |
| 32 | CMP (322.0 / 97.0)                      | 85 | Pipecolate (130.0 / 84.0)                                         |
| 33 | Cystamine (153.0 / 108.0)               | 86 | Propionate (73.0 / 55.0)                                          |
| 34 | Cysteine (122.0 / 59.0)                 | 87 | Pyroglutamic Acid (130.0 / 83.4)                                  |
| 35 | Cystine (241.1 / 120.0)                 | 88 | Pyruvate (87.0 / 43.0)                                            |
| 36 | Cytidine (244.0 / 112.1)                | 89 | Quinolate (166.0 / 78.0)                                          |
| 37 | Deoxycarnitine (147.1 / 87.0)           | 90 | Sarcosine (89.9 / 44.0)                                           |

|    |                                             |     |                                             |
|----|---------------------------------------------|-----|---------------------------------------------|
| 38 | D-GA3P (168.9 / 97.0)                       | 91  | Shikimic Acid (173.0 / 93.0)                |
| 39 | D-Leucic Acid (131.0 / 85.0)                | 92  | Sorbitol (183.0 / 91.0)                     |
| 40 | Epinephrine/Normetanephrine (184.1 / 166.2) | 93  | Spermidine (146.1 / 72.0)                   |
| 41 | Erythrose (119.0 / 71.0)                    | 94  | Succinate (117.0 / 73.0)                    |
| 42 | F16BP/F26BP/G16BP (339.0 / 97.0)            | 95  | Sucrose (341.0 / 59.0 (2))                  |
| 43 | G1P/G6P/F6P/F1P (259.0 / 97.0)              | 96  | Taurine (126.0 / 108.0)                     |
| 44 | Gama-aminobutyrate (102.1 / 56.0)           | 97  | Trimethylamine (TMA) (60.0 / 44.0)          |
| 45 | Glucoronate (193.0 / 73.0)                  | 98  | Trimethylamine-N-oxide (TMAO) (76.1 / 58.0) |
| 46 | Glucose (179.0 / 89.0)                      | 99  | Tryptamine (161.1 / 144.0)                  |
| 47 | Glutaric Acid (131.0 / 87.0)                | 100 | Tryptophan (205.1 / 146.0)                  |
| 48 | Glyceraldehyde (89.0 / 59.0)                | 101 | Tyramine (138.1 / 77.0)                     |
| 49 | Glycerate (105.0 / 75.0)                    | 102 | Urate (167.0 / 124.0)                       |
| 50 | Glycerol-3-P (171.0 / 79.0)                 | 103 | Uridine (245.0 / 113.1)                     |
| 51 | Glycine (76.0 / 30.1)                       | 104 | Xanthine (151.0 / 108.0)                    |
| 52 | Glycochenodeoxycholate (448.3 / 74.0)       | 105 | Xanthosine (283.1 / 151.0)                  |
| 53 | Glycocholate (464.3 / 74.0)                 | 106 | Xanthurenate (204.0 / 160.0)                |

#### Abbreviations:

HODE: Hydroxyoctadecadienoic acid

HETE: Hydroxyeicosatetraenoic acid

CMP: Cytidine monophosphate

GA3P: Glyceraldehyde 3-phosphate

F16BP: Fructose 1,6-bisphosphate

F26BP: Fructose: 2,6-bisphosphate

G16BP: Glucose 1,6-bisphosphate

G1P: Glucose 1-bisphosphate

G6P: Glucose 6-bisphosphate

F6P: Fructose 6-bisphosphate

F1P: F6P Fructose 1-bisphosphate

**Table S2:** List of metabolites quantified by NMR spectroscopy.

|    |                            |    |                 |    |                   |
|----|----------------------------|----|-----------------|----|-------------------|
| 1  | 1,2-Propanediol            | 19 | Citrate         | 37 | Lysine            |
| 2  | 2-Aminobutyric acid        | 20 | Creatine        | 38 | Mannose           |
| 3  | 2-Hydroxybutyrate          | 21 | Creatinine      | 39 | Methionine        |
| 4  | 2-Hydroxyisovaleric acid   | 22 | Dimethylglycine | 40 | Myoinositol       |
| 5  | 2-Oxoisocaproic acid       | 23 | Formic acid     | 41 | N-Acetylglycine   |
| 6  | 2-Oxoisovaleric acid       | 24 | Fumaric acid    | 42 | Ornithine         |
| 7  | 3-Hydroxybutyric acid      | 25 | Glucose         | 43 | Phenylalanine     |
| 8  | 3-methyl-2-oxovaleric acid | 26 | Glutamic acid   | 44 | Proline           |
| 9  | 3-Methylhistidine          | 27 | Glutamine       | 45 | Pyroglutamic acid |
| 10 | Acetate                    | 28 | Glycerol        | 46 | Sarcosine         |
| 11 | Acetylcarnitine            | 29 | Glycine         | 47 | Sucrose           |
| 12 | Alanine                    | 30 | Histidine       | 48 | Threonine         |
| 13 | Arginine                   | 31 | Hypoxanthine    | 49 | Tryptophan        |
| 14 | Asparagine                 | 32 | Isobutyric acid | 50 | Tyrosine          |
| 15 | Aspartate                  | 33 | Isoleucine      | 51 | Uridine           |
| 16 | Betaine                    | 34 | Isovaleric acid | 52 | Valine            |
| 17 | Carnitine                  | 35 | Lactate         |    |                   |
| 18 | Choline                    | 36 | Leucine         |    |                   |



**Table S3:** Metabolic pathways that are significantly different between patients with NAFL, early-NASH or advanced-NASH, and between different fibrosis stages or steatosis grades.

| NAFL vs NASH                                            |         |        | Early NASH vs Advanced NASH                         |            |        |
|---------------------------------------------------------|---------|--------|-----------------------------------------------------|------------|--------|
| Pathway                                                 | P value | Method | Pathway                                             | P value    | Method |
| Fatty acid biosynthesis                                 | 0.03    | MS     | Alpha-Linolenic acid metabolism                     | 0.004      | MS     |
| Tryptophan metabolism                                   | 0.04    | MS     | Linoleic acid metabolism                            | 0.01       | MS     |
| Nitrogen metabolism                                     | 0.04    | MS     | Ubiquinone and other terpenoid-quinone biosynthesis | 0.01       | MS     |
| Cysteine and methionine metabolism                      | 0.04    | NMR    | Caffeine metabolism                                 | 0.01       | MS     |
| Taurine and hypotaurine metabolism                      | 0.05    | NMR    | TCA cycle                                           | 0.01       | MS     |
| Selenoamino acid metabolism                             | 0.05    | NMR    | Alanine, aspartate and glutamate metabolism         | 0.01       | MS     |
| <b>NAFL vs Early NASH</b>                               |         |        | Glyoxylate and dicarboxylate metabolism             | 0.01       | MS     |
| Pathway                                                 | P value | Method | Pyrimidine metabolism                               | 0.04       | MS     |
| Ubiquinone and other terpenoid-quinone biosynthesis     | 0.01    | MS     |                                                     |            |        |
| Fatty acid biosynthesis                                 | 0.04    | MS     |                                                     |            |        |
| <b>Hepatic fibrosis stage 0-1 vs Fibrosis stage 2-4</b> |         |        | <b>Steatosis grade 0-1 vs Steatosis grade 2-3</b>   |            |        |
| Pathway                                                 | P value | Method | Pathway                                             | P value    | Method |
| Porphyryn and chlorophyll metabolism                    | 0.03    | MS     | Galactose metabolism                                | 0.007      | MS     |
| Valine, leucine and isoleucine biosynthesis             | 0.03    | MS     | Amino sugar and nucleotide sugar metabolism         | 0.007/0.02 | MS/NMR |
| Aminoacyl-tRNA biosynthesis                             | 0.03    | MS     | Starch and sucrose metabolism                       | 0.007/0.02 | MS/NMR |
| Glycine, serine and threonine metabolism                | 0.03    | MS     | Pentose phosphate pathway                           | 0.007/0.02 | MS/NMR |
| TCA cycle                                               | 0.04    | MS     | Glycolysis and gluconeogenesis                      | 0.008/0.02 | MS/NMR |
| Alanine, aspartate and glutamate metabolism             | 0.04    | MS     | Fructose and mannose metabolism                     | 0.003      | NMR    |
| Glyoxylate and dicarboxylate metabolism                 | 0.04    | MS     |                                                     |            |        |

**Table S4:** Metabolites that differed significantly between male and female patients.

| <b>Metabolite</b>          | <b>P Value</b> | <b>Fold change*</b> | <b>Method</b> |
|----------------------------|----------------|---------------------|---------------|
| Glycine                    | 0.004          | 0.70                | MS            |
| Glutamic acid              | 0.010          | 1.27                | NMR           |
| Leucine                    | 0.009          | 1.23                | NMR           |
| Isoleucine                 | 0.004          | 1.41                | NMR           |
| Lysine                     | 0.01           | 1.27                | NMR           |
| 3-methyl-2-oxovaleric acid | 0.02           | 1.37                | NMR           |
| 2-Oxoisocaproic acid       | 0.03           | 1.34                | NMR           |
| Lactate                    | 0.02           | 1.41                | NMR           |
| Formic acid                | 0.009          | 1.37                | NMR           |
| Choline                    | 0.03           | 1.46                | NMR           |
| Hypoxanthine               | 0.01           | 2.08                | NMR           |
| Proline                    | 0.003          | 1.40                | NMR           |
| Glycerol                   | 0.04           | 0.63                | NMR           |
| Creatinine                 | 0.03           | 1.28                | NMR           |
| 2-hydroxybutyrate          | 0.03           | 1.83                | NMR           |
| Trimethylamine-N-oxide     | 0.02           | 0.50                | MS            |
| 13-HODE*                   | 0.004          | 0.68                | MS            |

\* The fold changes are the ratios of male/female patients.

HODE: Hydroxyoctadecadienoic acid

**Table S5:** Metabolites that differed significantly between diabetes and non-diabetes patients.

| <b>Metabolites</b>             | <b>P Value</b> | <b>Fold change*</b> | <b>Method</b> |
|--------------------------------|----------------|---------------------|---------------|
| Glycine                        | 0.05           | 0.8                 | NMR           |
| Hydroxyproline/Aminolevulinate | 0.004          | 1.4                 | MS            |
| Propionate                     | 0.02           | 1.4                 | MS            |
| Isovaleric Acid                | 0.05           | 1.3                 | MS            |
| Guanidinoacetate               | 0.009          | 0.8                 | MS            |
| Mevalonate                     | 0.004          | 1.5                 | MS            |
| Oxypurinol                     | 0.04           | 1.5                 | MS            |
| Xanthine                       | 0.05           | 1.5                 | MS            |
| 2-Aminoadipate                 | 0.03           | 1.3                 | MS            |
| Sucrose                        | 0.04           | 1.1                 | MS            |

\* The fold changes are the ratios of diabetes/non-diabetes patients.
